# Supplementary material for: Heterostructural Mixed Oxides Prepared via ZnAlLa LDH or ex-ZnAl LDH Precursors—Effect of La Content and Its Incorporation Route
Source: MDPI journal article supplement (doi:10.3390/ma14082082), 2021-04-20
Supplement: s1 [file s1]

## Article

# Heterostructural Mixed Oxides Prepared Via ZnAlLa LDH or ex-ZnAl LDH Precursors—Effect of La Content and Its Incorporation Route

Katarzyna Antoniak-Jurak<sup>1\*</sup>, Paweł Kowalik<sup>1</sup>, Wiesław Próchniak<sup>1</sup>, Robert Bicki<sup>1</sup>, Grzegorz Słowik<sup>2</sup>

<sup>1</sup> Catalysts Department, Łukasiewicz Research Network - New Chemical Syntheses Institute, Al. Tysiąclecia Państwa Polskiego 13A, 24-110 Puławy, Poland; pawel.kowalik@ins.lukasiewicz.gov.pl (P.K.); wieslaw.prochniak@ins.lukasiewicz.gov.pl (W.P.); robert.bicki@ins.lukasiewicz.gov.pl (R.B.)

<sup>2</sup> Department of Chemical Technology, Institute of Chemical Sciences, Faculty of Chemistry, Maria Curie-Skłodowska University in Lublin, Maria Curie-Skłodowska Sq. 3, 20-031 Lublin, Poland; grzegorz.slowik@poczta.umcs.lublin.pl

\* Correspondence: katarzyna.antoniak@ins.lukasiewicz.gov.pl; Tel.: 4881-4731754

**Table S1.** Effect of La addition and incorporation route on the size of ZnO and ZnAl<sub>2</sub>O<sub>4</sub> crystallites.

| Material    | d <sub>ZnO</sub> (nm) | a (Å) | ZnAl <sub>2</sub> O <sub>4</sub> (nm) |
|-------------|-----------------------|-------|---------------------------------------|
| ZnAl_Wk_1La | 2.5                   | 8.01  | 1.3                                   |
| ZnAl_Wk_2La | 2.4                   | 8.01  | 1.2                                   |
| ZnAl_Wk_3La | 2.2                   | 8.04  | 1.2                                   |
| ZnAl_Wk_4La | 2.1                   | 8.04  | 1.2                                   |
| ZnAl_Wk_5La | 1.7                   | 8.08  | 1.2                                   |
| ZnAl_Ik_1La | 2.5                   | 8.078 | 2.9                                   |
| ZnAl_Ik_2La | 2.5                   | 8.077 | 2.7                                   |
| ZnAl_Ik_3La | 2.7                   | 8.078 | 2.7                                   |
| ZnAl_Ik_4La | 5.7                   | 8.083 | 2.9                                   |
| ZnAl_Ik_5La | 11.9                  | 8.100 | 2.9                                   |

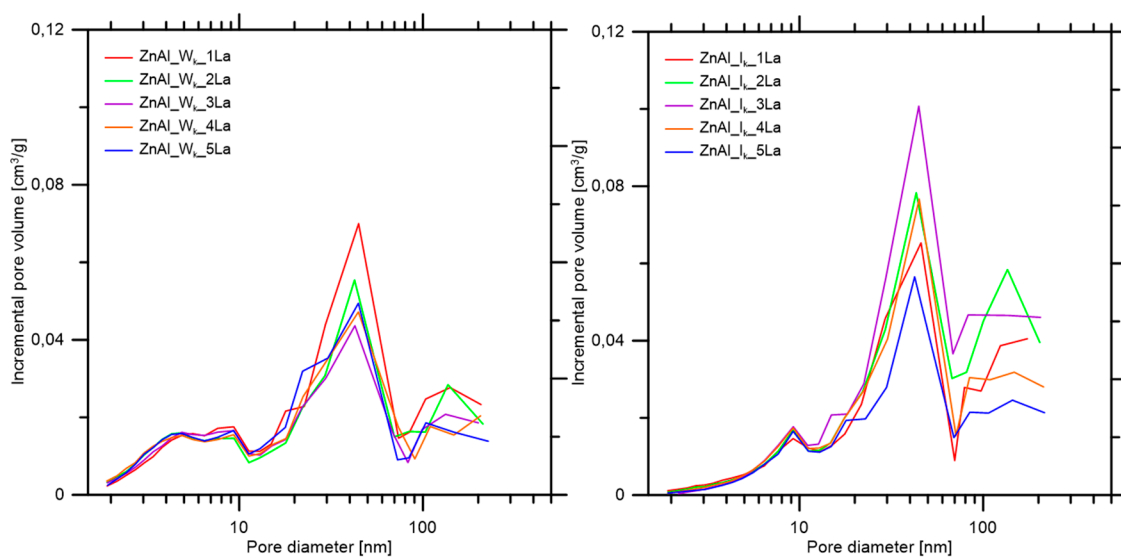

**Figure S1.** Pore size distribution of ZnAl\_W<sub>k</sub>\_xLa and ZnAl\_I<sub>k</sub>\_xLa materials.

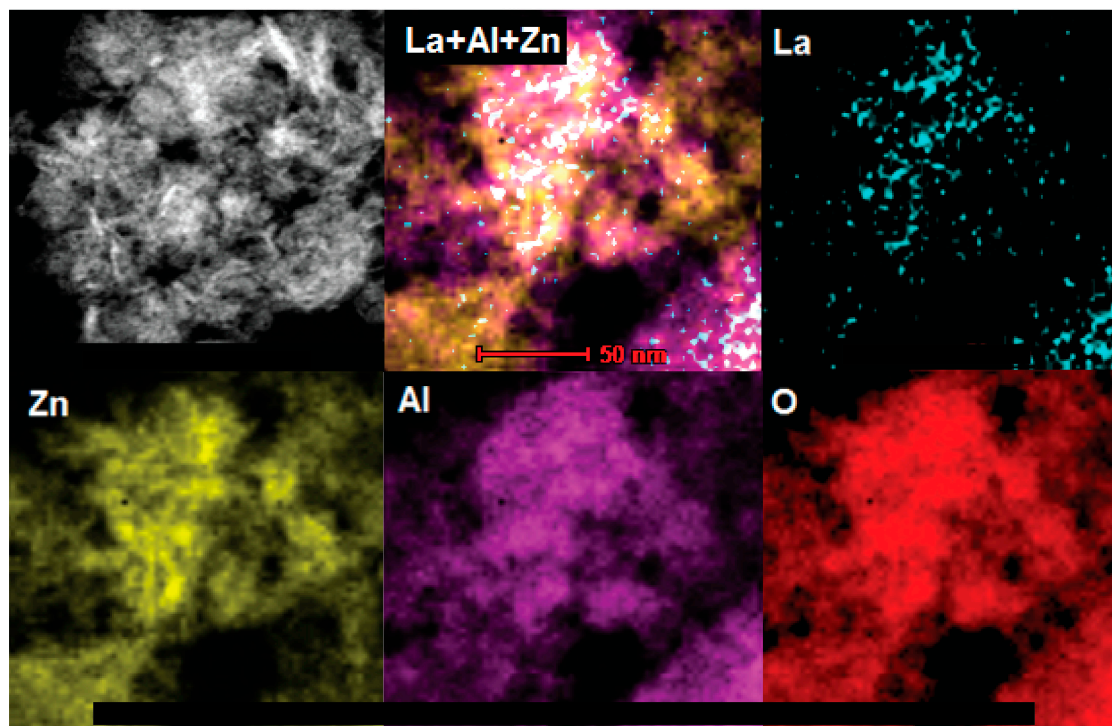

**Figure S2.** STEM-EDS images along with detailed maps of La (turquoise), Zn (yellow), Al (purple), and O (red) distributions of the ZnAl\_W<sub>k</sub>\_1La material.

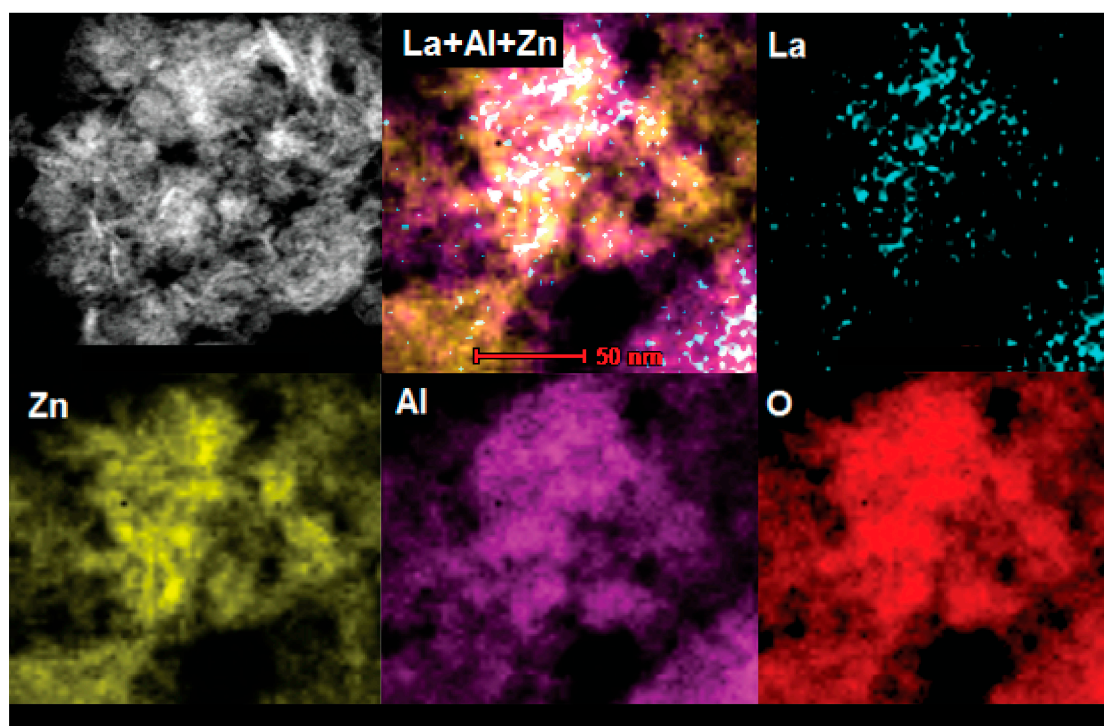

**Figure S3.** STEM-EDS images along with detailed maps of La (turquoise), Zn (yellow), Al (purple), and O (red) distributions of the ZnAl<sub>Wk</sub>\_5La material.

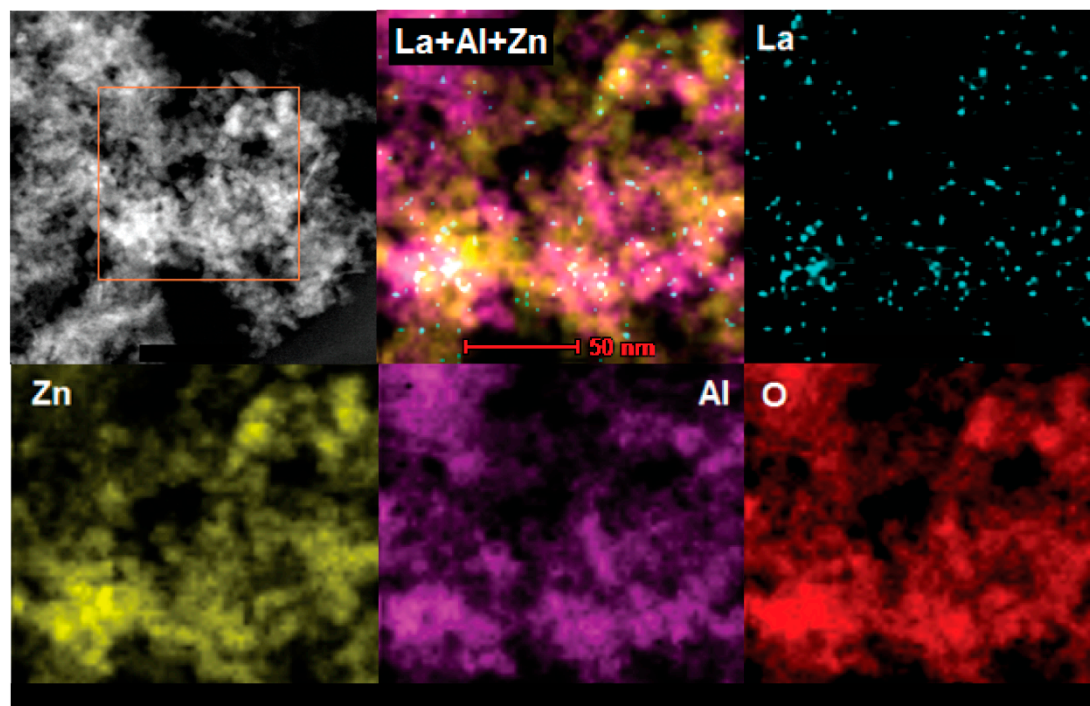

**Figure S4.** STEM-EDS images along with detailed maps of La (turquoise), Zn (yellow), Al (purple), and O (red) distributions of the ZnAl<sub>Ik</sub>\_1La material.

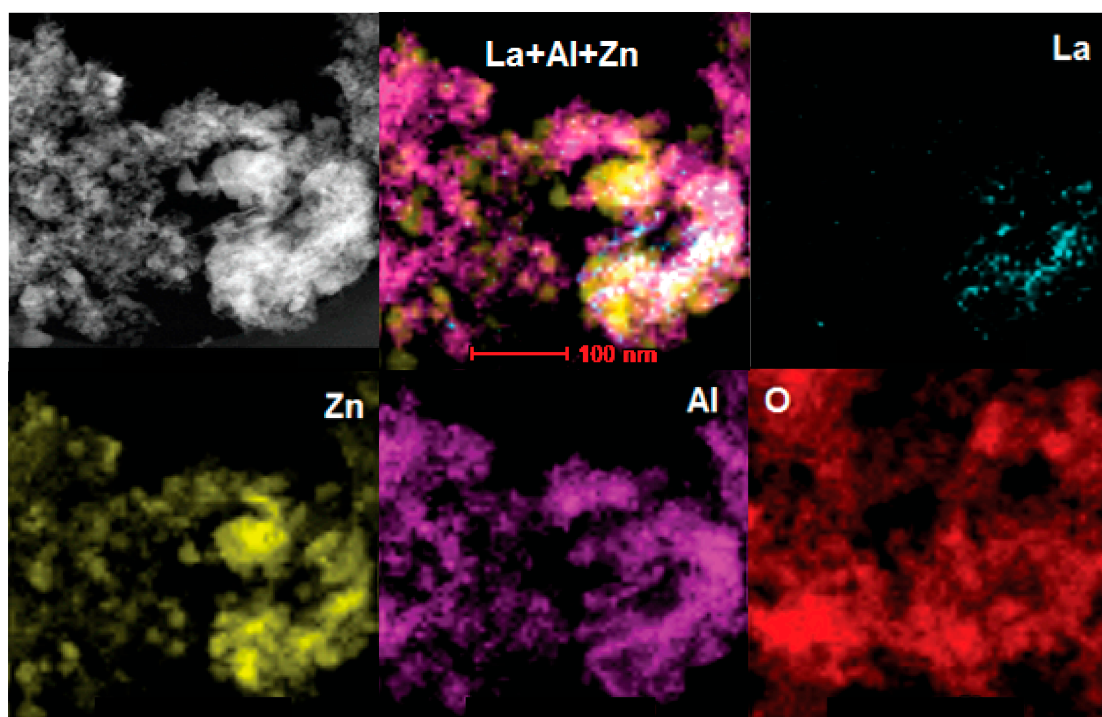

**Figure S5.** STEM-EDS images along with detailed maps of La (turquoise), Zn (yellow), Al (purple), and O (red) distributions of the ZnAl<sub>1k</sub>5La material.

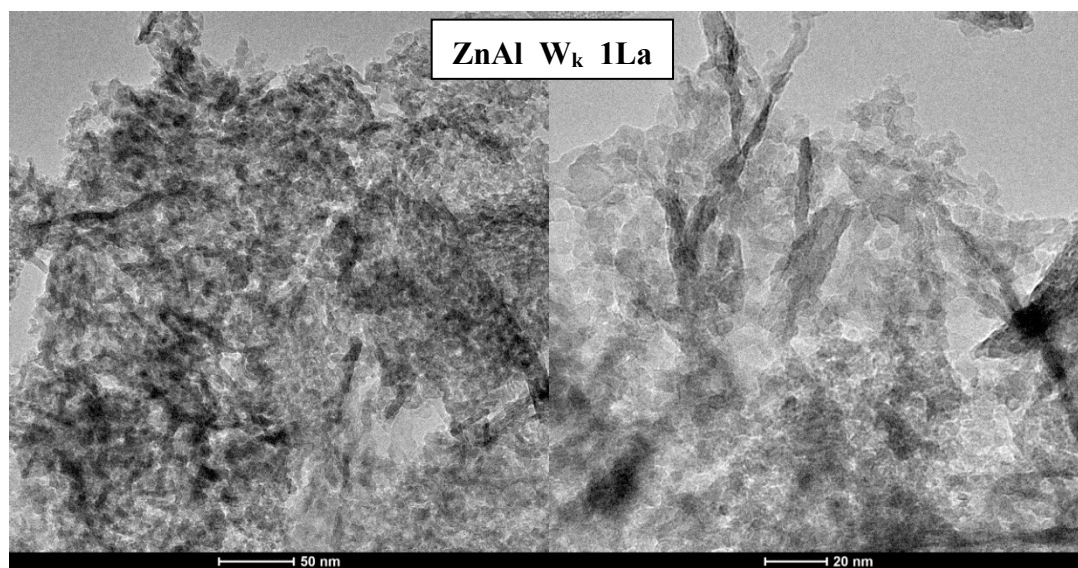

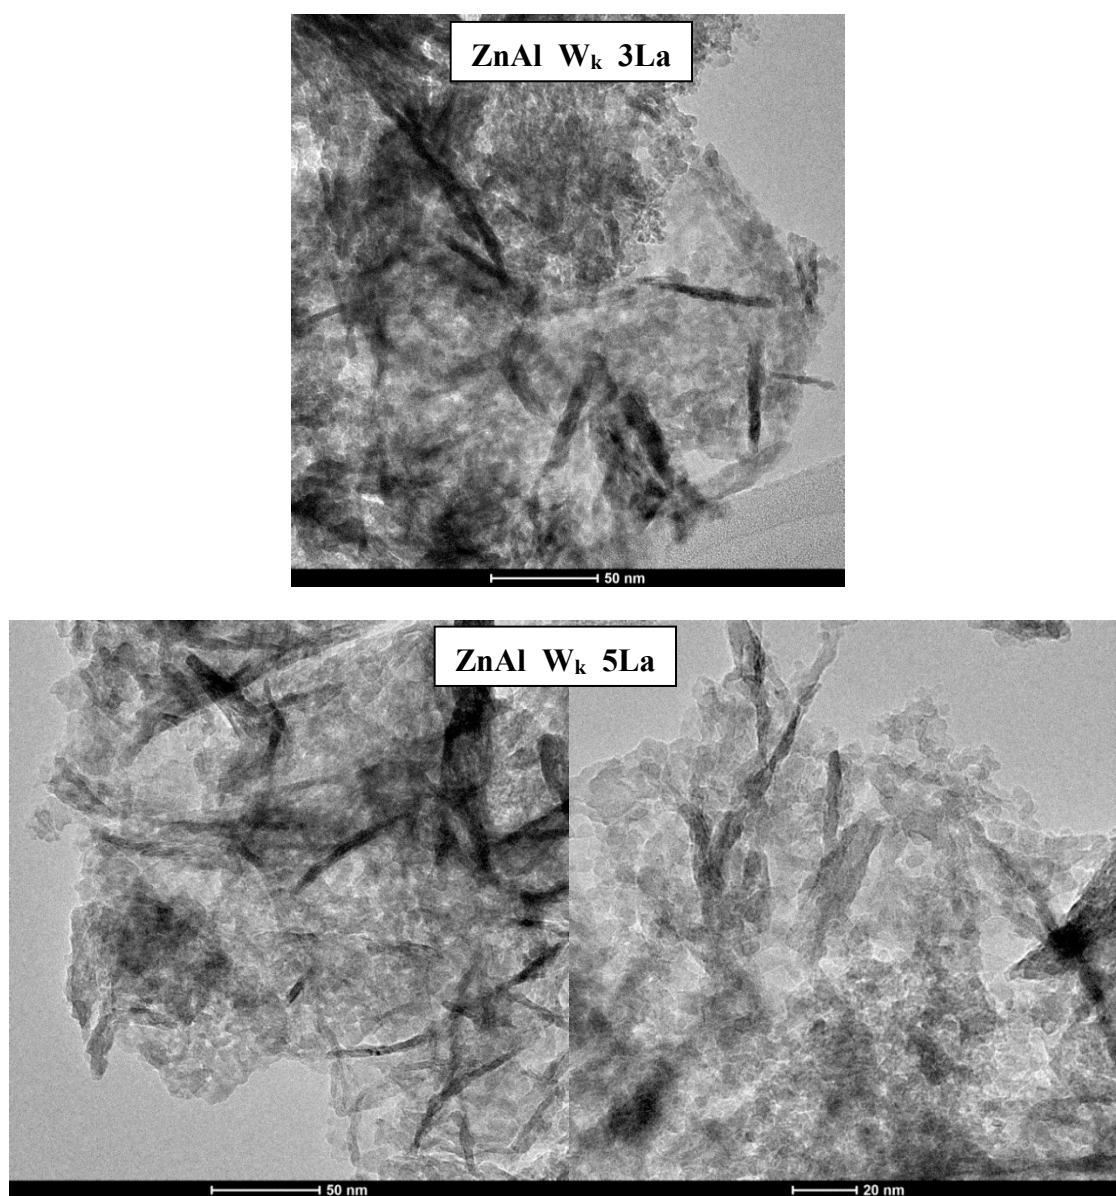

Figure S6. TEM images of ZnAl<sub>W<sub>k</sub></sub>xLa materials.

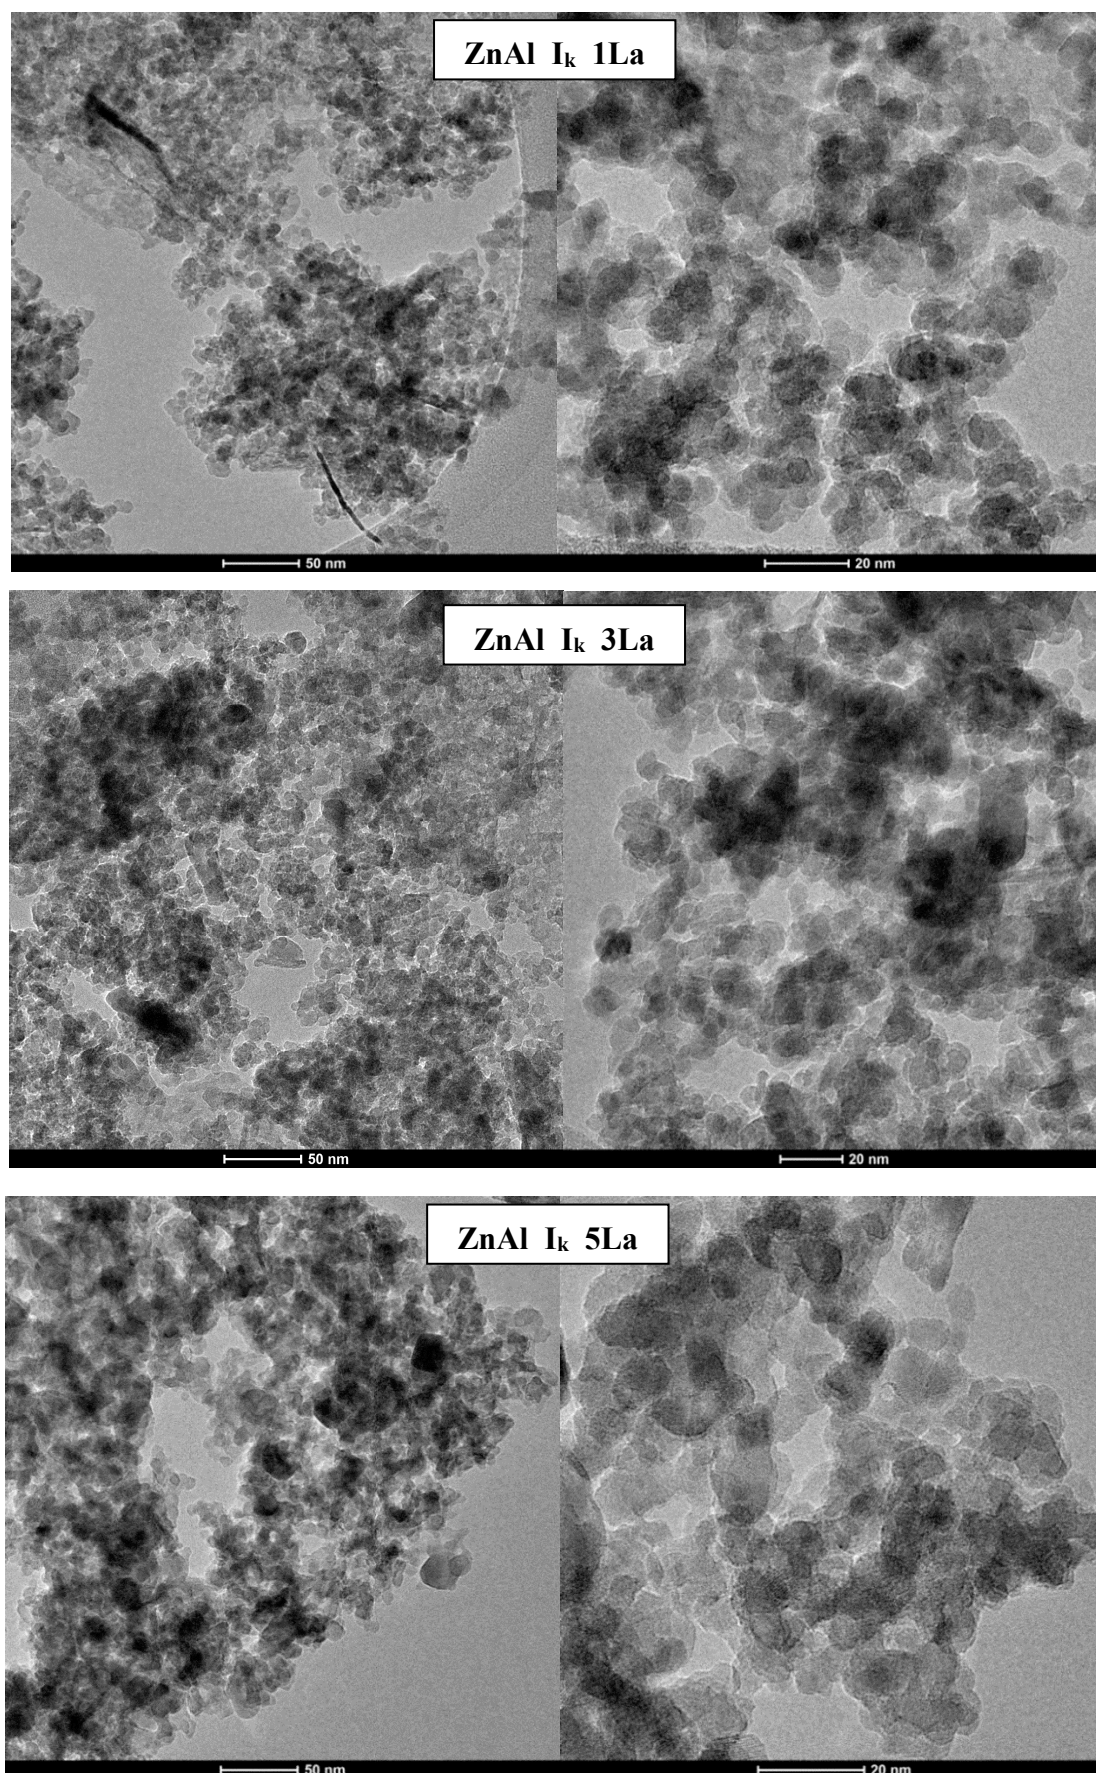

Figure S7. TEM images of ZnAl I<sub>k</sub> xLa materials.
